# Supplementary material for: Seascape genomics reveals limited dispersal and suggests spatially varying selection among European populations of sea lamprey (Petromyzon marinus)
Source: PubMed Central journal article supplement (PMC10286227; doi:10.1111/eva.13561), 2023-05-27

Distribution of mean F in Ulla

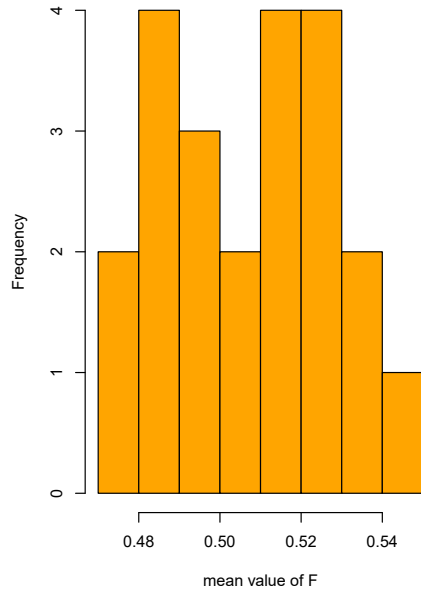

Distribution of mean F in Rolfsan

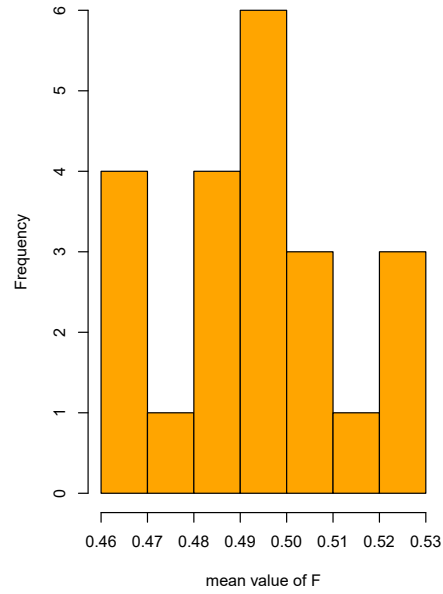

Distribution of mean F in Mondego

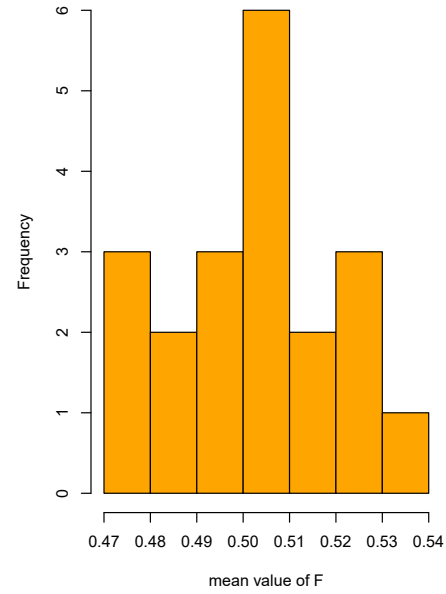

Distribution of mean F in Frome

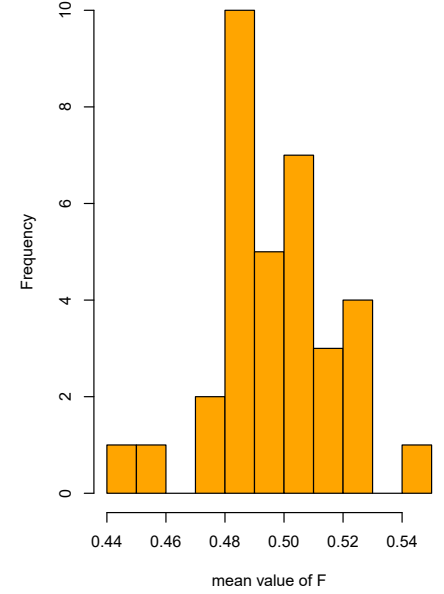

Distribution of mean F in Gironde

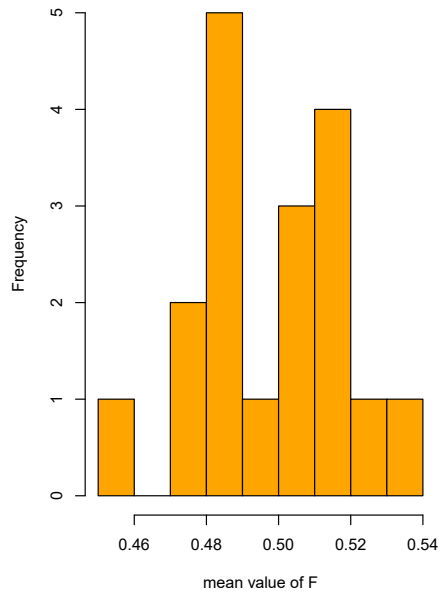

Distribution of mean F in Severn

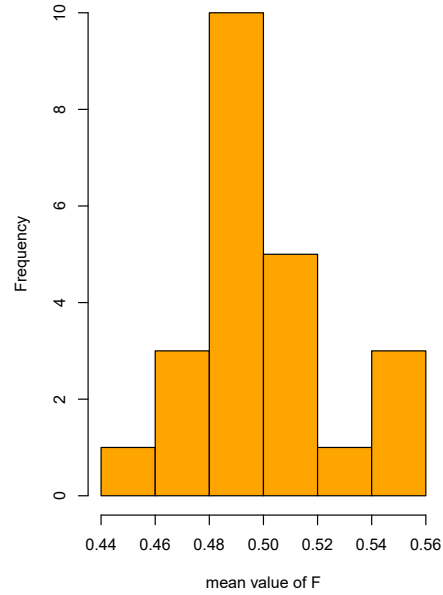

Distribution of mean F in Tagus

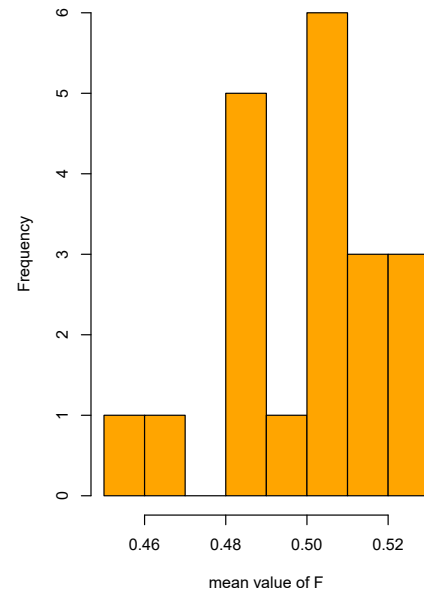

Distribution of mean F in Ouse

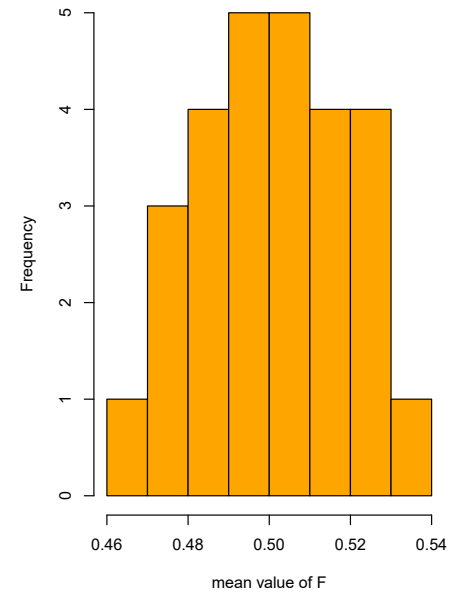

Supplement: EVA-16-1169-s002.pdf [file EVA-16-1169-s002.pdf]
