# Supplementary material for: Seascape genomics reveals limited dispersal and suggests spatially varying selection among European populations of sea lamprey (Petromyzon marinus)
Source: PubMed Central journal article supplement (PMC10286227; doi:10.1111/eva.13561), 2023-05-27

Projection onto PC1 and PC2

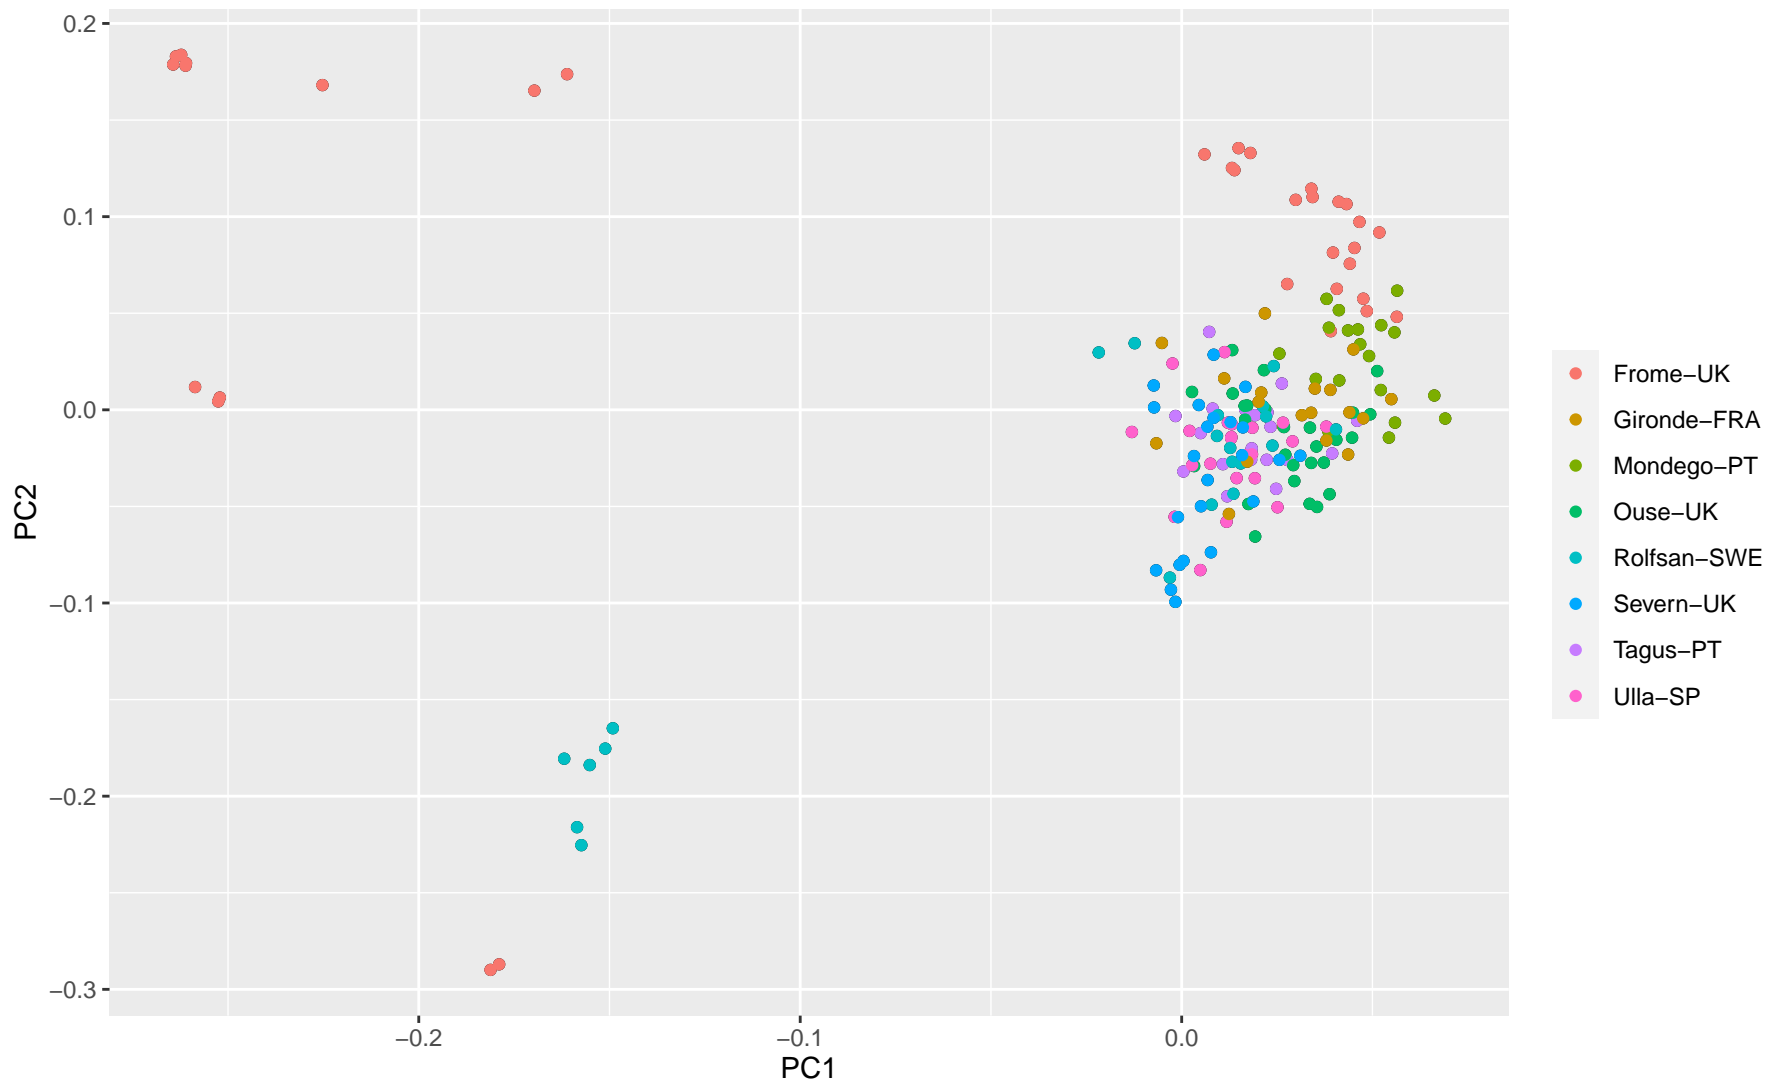

Supplement: EVA-16-1169-s006.pdf [file EVA-16-1169-s006.pdf]
